# Supplementary material
Source: PubMed Central journal article supplement (PMC3292586)
Supplement: NIHMS259031-supplement-01.pdf [file NIHMS259031-supplement-01.pdf]

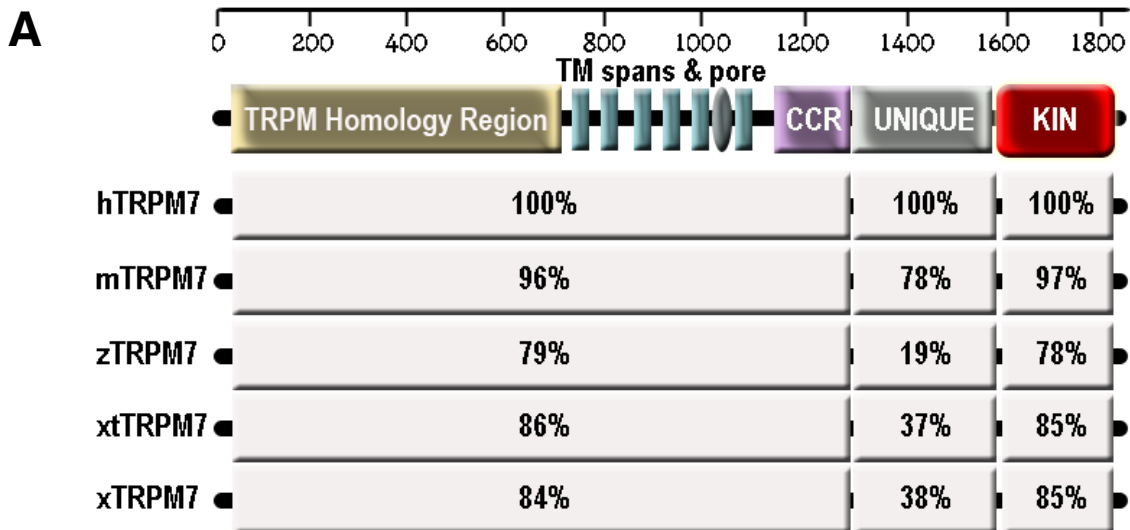

**B**

|         |                                               |      |
|---------|-----------------------------------------------|------|
| hTRPM7  | L A K D I V F H P Y W M I F G E V Y A Y E I D | 1054 |
| mTRPM7  | L A K D I V F H P Y W M I F G E V Y A Y E I D | 1054 |
| zTRPM7  | L A K D V V F Q P Y W M M Y G E V Y A Y E I D | 1033 |
| xtTRPM7 | L A R D I V F Q P Y W M I F G E V Y A Y E I D | 1062 |
| xTRPM7  | L A K N I V F Q P Y W M I F G E V Y A Y E I D | 1062 |
|         | L A K D I V F Q P Y W M I F G E V Y A Y E I D |      |

**C**

|         |                                                                                                                                                         |      |
|---------|---------------------------------------------------------------------------------------------------------------------------------------------------------|------|
| hTRPM7  | P V T V Y R L E E S S P N I L N N S M S S W S Q L G L C A K I E F L S K E E M G G G L R R A V K V Q C T W S E H D I L K S G H L Y I I K S F L P E V I   | 1654 |
| mTRPM7  | P V T V Y R L E E S S P S I L N N S M S S W S Q L G L C A K I E F L S K E E M G G G L R R A V K V L C T W S E H D I L K S G H L Y I I K S F L P E V I   | 1652 |
| ZTRPM7  | P V S V Y R L E E S S P G S I N N S M S S W A Q R G L C A K I E F L S K E E M G G G L R R A L K V L C T W S E Y D I L K P P G H L Y I V K S F L P E V I | 1564 |
| xtTRPM7 | L V T V Y R L E E S S P N M L N N S M S S W S Q R T G L C A K I E F L S K E E M G G G L R R A V K V V C T W S E N D I L K A G H L Y I I K S F H P E V I | 1658 |
| xTRPM7  | L V T V Y R L E E S S P N M L N N S M S S W S Q T G L C A K I E F L S K E E M G G G L R R A V K V V C T W S E N D I L K A S H L Y I I K S F H P E V I   | 1671 |
|         | P V T V Y R L E E S S P N L N N S M S S W S Q L G L C A K I E F L S K E E M G G G L R R A V K V . C T W S E D I L K G H L Y I I K S F L P E V I         |      |

|         |                                                                                                                                                     |      |
|---------|-----------------------------------------------------------------------------------------------------------------------------------------------------|------|
| hTRPM7  | N T W S S I Y K E D T V L H L C L R E I Q Q R A A Q K L T F A F N Q M K P K S I P Y S P R F L E V F L L Y C H S A G Q W F A V E E C M T G E F R K Y | 1729 |
| mTRPM7  | N T W S S I Y K E D T V L H L C L R E I Q Q R A A Q K L T F A F N Q M K P K S I P Y S P R F L E V F L L Y C H S A G Q W F A V E E C M T G E F R K Y | 1727 |
| ZTRPM7  | N T W Q T I Y R E E T V L H L C L R E I Q Q R A A Q K L T F A F N Q I R P K T I P Y S P R F L E V F L L Y C H S A G Q W F A I E E C I T G D F R K F | 1639 |
| xtTRPM7 | N T W L G V Y K E D T V L H L C L K E I Q Q R A A Q K M T F A F N A M K P K S I P Y S P R F L E V F L L Y C H S A G Q W F A I E E C M T G E F R K Y | 1733 |
| xTRPM7  | N T W L G V Y K E D T V L H L S L K E I Q Q R A A Q K M T S A F N A M K P K S I P Y S P R F L E V F L L Y C H S A G Q W F A I E E C M T G E F R K Y | 1746 |
|         | N T W . I Y K E D T V L H L C L R E I Q Q R A A Q K L T F A F N Q M K P K S I P Y S P R F L E V F L L Y C H S A G Q W F A I E E C M T G E F R K Y   |      |

|         |                                                                                                                                                           |      |
|---------|-----------------------------------------------------------------------------------------------------------------------------------------------------------|------|
| hTRPM7  | N N N N G D E I I P T N T L E E I M L A F S H W T Y E Y T R G E L L V L D L Q G V G E N L T D P S V I K A E E K R S C D M V F G P A N L G D A I K N       | 1804 |
| mTRPM7  | N N N N G D E I I P T N T L E E I M L A F S H W T Y E Y T R G E L L V L D L Q G V G E N L T D P S V I K A E E K R S C D M V F G P A N L G D A I K N       | 1802 |
| ZTRPM7  | N N N N G D E I V P T N L L E E T M L A F S H W T Y E Y T R G E L L V L D L Q G V G E I L T D P S V I K S G E K R S G S Y D M I F G P A N L G D D A I R N | 1714 |
| xtTRPM7 | N N N N G D E S I P T N M L E E T M L A F S H W T F E Y T R G E L L V L D L Q G V G E N L T D P S V I K S G E K R S D M V F G P A N L G D D A I R N       | 1808 |
| xTRPM7  | N N N N G D E S I P T N M L E E T M L A F S H W T F E Y T R G E L L V L D L Q G V G E N L T D P S V I K S G E K R S D M V F G P A N L G D D A I K N       | 1821 |
|         | N N N N G D E I I P T N L E E T M L A F S H W T Y E Y T R G E L L V L D L Q G V G E N L T D P S V I K S G E K R S D M V F G P A N L G D D A I K N         |      |

|         |                                                                                                                               |      |
|---------|-------------------------------------------------------------------------------------------------------------------------------|------|
| hTRPM7  | F R A K H H C N S C C R K L K L P D L K R N D Y T P D K I I F P Q D E S S D L N L Q S P - - G N S T K E S E S T N S V R L M L | 1864 |
| mTRPM7  | F R A K H H C N S C C R K L K L P D L K R N D Y T P D K I I F P Q D E S S D L N L Q S - - G N S T K E S E A T N S V R L M L   | 1862 |
| ZTRPM7  | F R A K H H C N S C C R K L K L P D L K R N D Y T P D K L T L Q H D P S E G P S H S P P A G A A T K E L R - - P S M R L M L   | 1774 |
| xtTRPM7 | F R A K H H C N S C C R K L K L P D L R R N D Y T P D K V T F A Q E E S T S S T D P - - D N F T K E S K - - N S I R L M L     | 1866 |
| xTRPM7  | F R A K H H C N S C C R K L K L P D L R R N D Y T P D K V T F A Q E E S T S S T D P - - D N F T K E S K - - N S L R L M L     | 1879 |
|         | F R A K H H C N S C C R K L K L P D L K R N D Y T P D K . T F Q D E S . D S P P A G N T K E S . T N S . R L M L               |      |
