# Supplementary material
Source: PubMed Central journal article supplement (PMC3292586)

**A**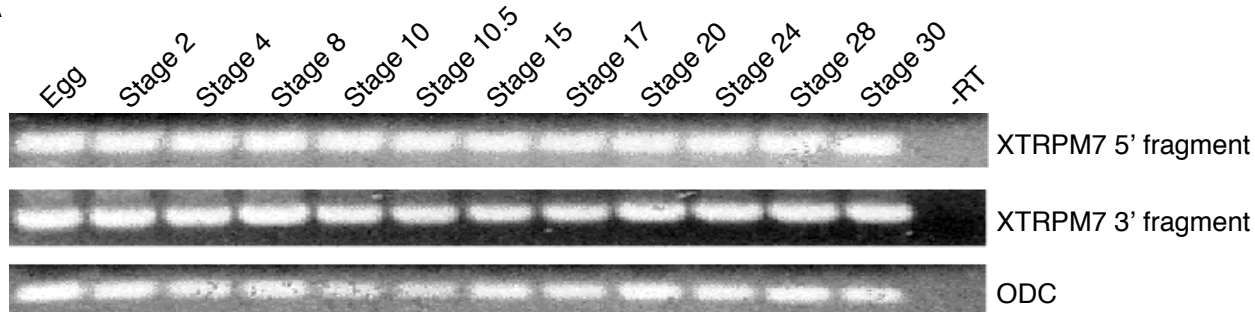**B**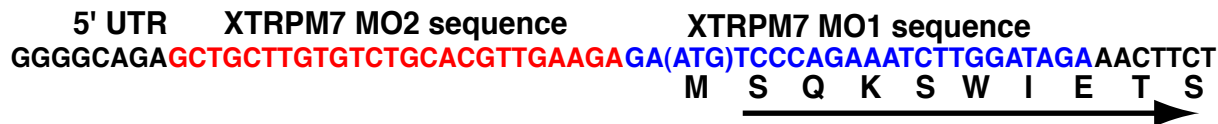**C**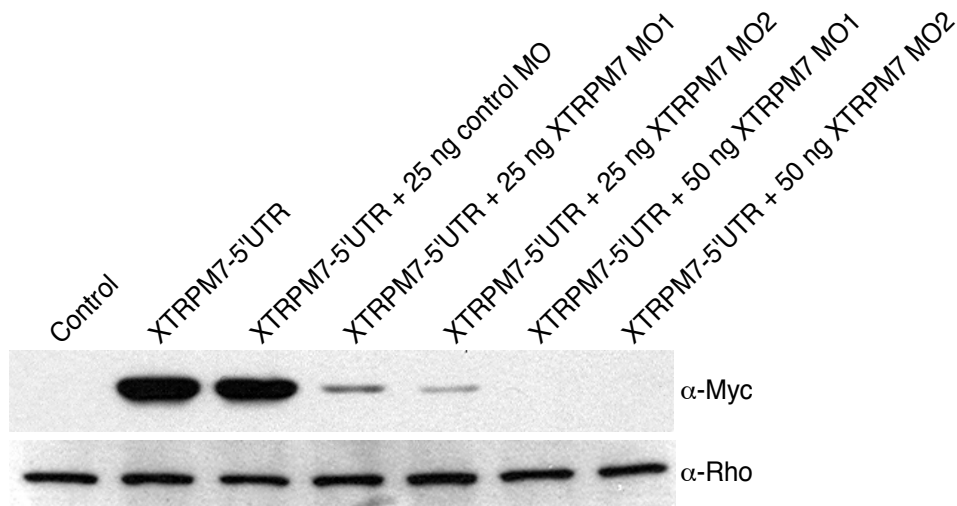

Supplement: NIHMS259031-supplement-02.pdf [file NIHMS259031-supplement-02.pdf]

**A**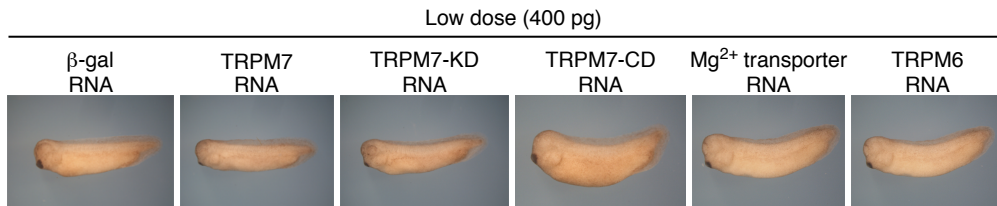**B**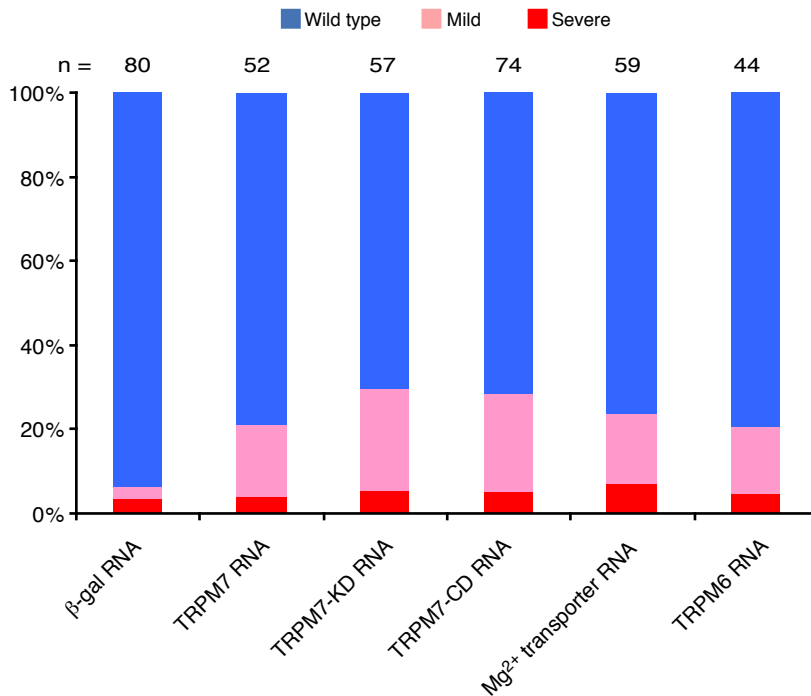

Supplement: NIHMS259031-supplement-03.pdf [file NIHMS259031-supplement-03.pdf]
